# Supplementary material for: Liquid crystals based on silver carbene complexes derived from dimeric bis(imidazolium) bromide salts
Source: Royal Society of Chemistry journal article supplement (doi:10.1039/c4ra11023d), 2014-01-01
Supplement: c4ra11023d1.pdf [file c4ra11023d1.pdf]

## Electronic supplementary information

### Liquid crystals based on silver carbene complexes derived from dimeric bis (imidazolium) bromide salts

Amalia Pană<sup>a</sup>, Monica Iliș<sup>a</sup>, Marin Micutz<sup>b</sup>, Florea Dumitrașcu<sup>c</sup>, Iuliana Pasuk<sup>d</sup>, Viorel Cîrcu<sup>a</sup>

<sup>a</sup>Dept. of Inorganic Chemistry, University of Bucharest, 23 Dumbrava Rosie st, sector 2, Bucharest 020464, Romania, e-mail: viorel\_carcu@yahoo.com, viorel.circu@g.unibuc.ro

<sup>b</sup>Dept. of Physical Chemistry, University of Bucharest, 4-12 Elisabeta Blvd., Bucharest 030018, Romania

<sup>c</sup>Centre for Organic Chemistry "C. D. Nenitzescu", Romanian Academy, Spl. Independentei 202B, Bucharest 060023, Romania

<sup>d</sup>National Institute of Materials Physics, P.O. Box MG-7, Magurele, 077125, Romania

#### Content:

|                                                                                                                                                                                                                                                                    |     |
|--------------------------------------------------------------------------------------------------------------------------------------------------------------------------------------------------------------------------------------------------------------------|-----|
| 1. Fig. 1 Optical texture for <b>2a</b> at 51°C (a), for <b>2b</b> at 77°C (b) and for <b>2c</b> at 92°C (c)                                                                                                                                                       | p.2 |
| 2. Fig. 2 Optical texture for <b>3a</b> at 50°C in SmA phase (a); the same region when irradiated in the 280-320 nm range (b); picture of <b>3a</b> in solid state at 25°C (c); picture of <b>3a</b> in solid state at 25°C irradiated in the 280-320 nm range (d) | p.2 |
| 3. Fig. 3 Optical texture for <b>3b</b> at 45°C (left); the same region when irradiated in the 280-320 nm range (right)                                                                                                                                            | p.3 |
| 4. Fig. 4 Optical texture for <b>3c</b> at 129°C                                                                                                                                                                                                                   | p.3 |
| 5. Fig. 5 Fingerprint texture of a mixture of <b>3c</b> in 5CB (1%) recorded at 29°C                                                                                                                                                                               | p.3 |
| 6. Fig. 6 DSC traces of <b>2a</b> , first heating – cooling cycle (left) and second heating-cooling cycle (right)                                                                                                                                                  | p.4 |
| 7. Fig. 7 DSC traces of <b>2b</b> , first heating-cooling cycle (left) and second heating-cooling cycle (right)                                                                                                                                                    | p.4 |
| 8. Fig. 8 DSC trace for <b>2c</b> (first heating run)                                                                                                                                                                                                              | p.4 |
| 9. Fig. 9 DSC trace for <b>2c</b> , first (left) and second (right) heating cooling cycle up to 120°C                                                                                                                                                              | p.5 |
| 10. Fig. 10 DSC traces of <b>3a</b> , first heating-cooling cycle (left) and second heating-cooling cycle (right)                                                                                                                                                  | p.5 |
| 11. Fig. 11 DSC traces of <b>3b</b> , first heating-cooling cycle (left) and second heating-cooling cycle (right)                                                                                                                                                  | p.5 |
| 12. Fig. 12 DSC traces for <b>3c</b> (second heating cooling cycle in the 10 – 180°C range)                                                                                                                                                                        | p.6 |
| 13. Fig. 13 The TG curves for bis(imidazolium) salts <b>2a-c</b> and their silver carbene complexes <b>3a-c</b>                                                                                                                                                    | p.6 |
| 14. Fig. 14 X-ray powder diffraction pattern for <b>2a</b> recorded at 44°C on cooling from isotropic liquid (left) and for <b>3a</b> recorded at 50°C on cooling from isotropic liquid (right)                                                                    | p.7 |
| 15. Fig. 15 X-ray powder diffraction pattern for <b>2b</b> recorded at 65°C on cooling from isotropic liquid (left) and for <b>3b</b> recorded at 60°C on cooling from isotropic liquid (right)                                                                    | p.7 |
| 16. Fig. 16 X-ray powder diffraction pattern for <b>2c</b> recorded at 81°C on heating from glassy state                                                                                                                                                           | p.8 |
| 17. Fig. 17. Powder X-ray diffraction pattern for <b>2c</b> at different temperatures                                                                                                                                                                              | p.8 |
| 18. Fig. 18. Powder X-ray diffraction pattern for <b>3c</b> at different temperatures                                                                                                                                                                              | p.9 |
| 19. Fig. 19 The solid state emission spectra (recorded as 10% w/w in PMMA films) of bis (imidazolium) salts <b>2a-c</b> and their silver carbene complexes <b>3a-c</b>                                                                                             | p.9 |

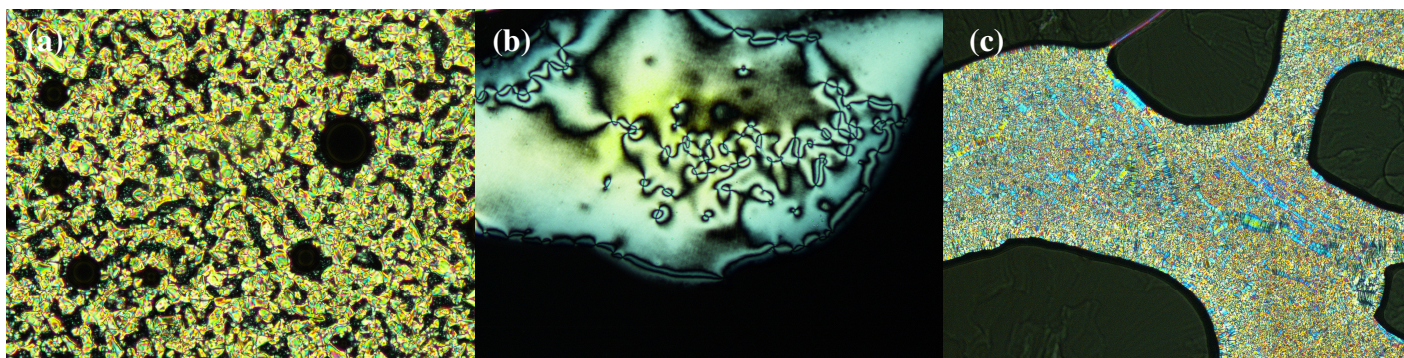

Fig. 1 Optical texture for **2a** at 51°C (a), for **2b** at 77°C (b) and for **2c** at 92°C (c).

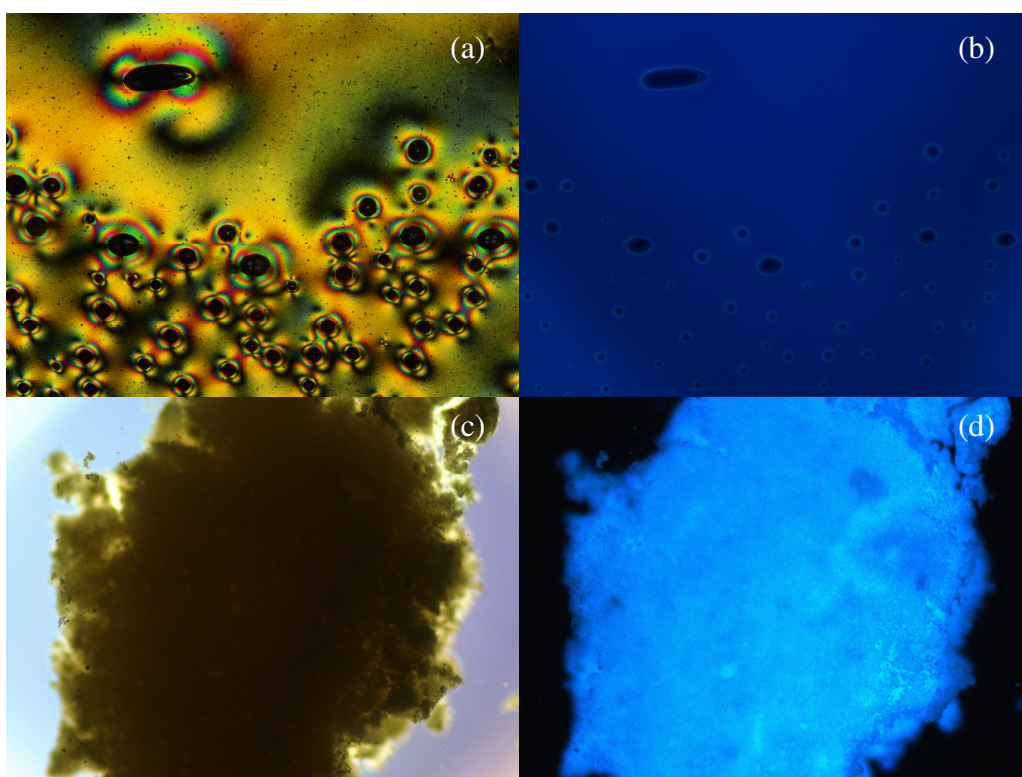

Fig. 2 Optical texture for **3a** at 50°C in SmA phase (a); the same region when irradiated in the 280-320 nm range (b); picture of **3a** in solid state at 25°C (c); picture of **3a** in solid state at 25°C irradiated in the 280-320 nm range (d).



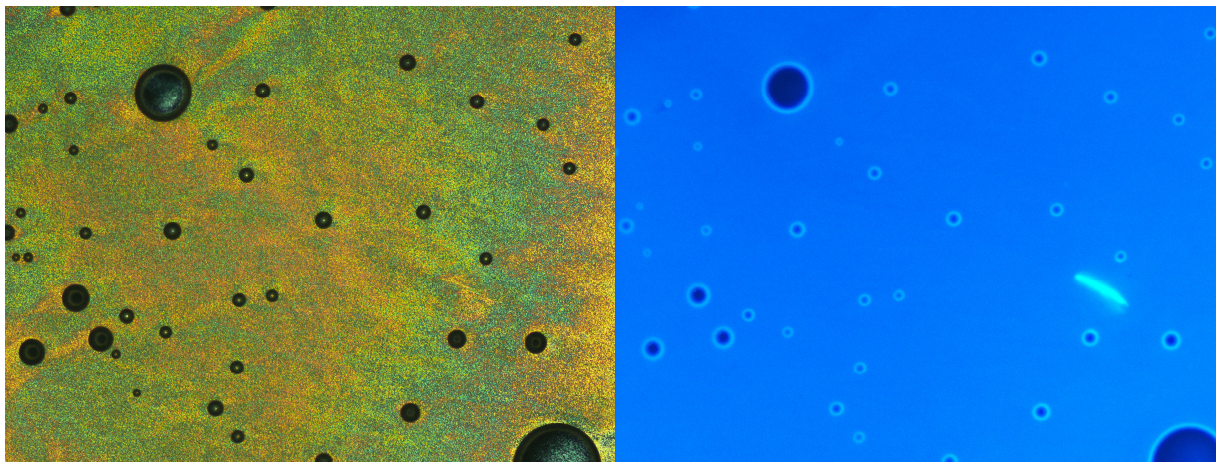

Fig. 3 Optical texture for **3b** at 45°C (left); the same region when irradiated in the 280-320 nm range (right)

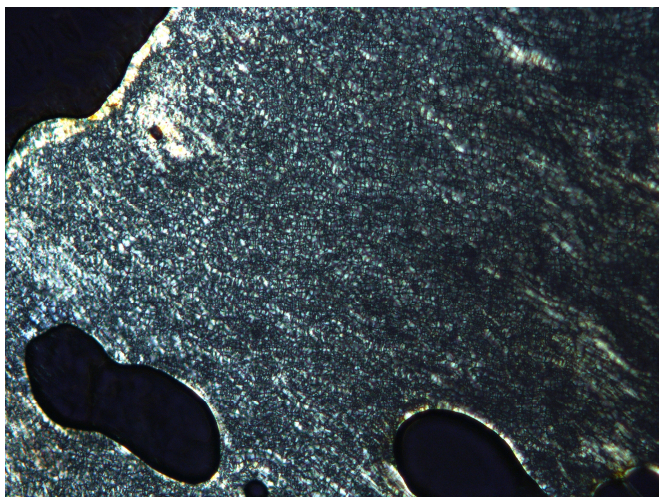

Fig. 4 Optical texture for **3c** at 129°C.

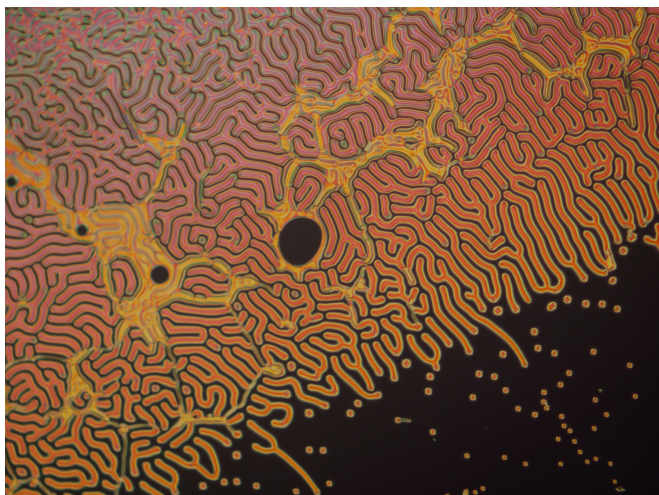

Fig. 5 Fingerprint texture of a mixture of **3c** in 5CB (1%) recorded at 29°C.

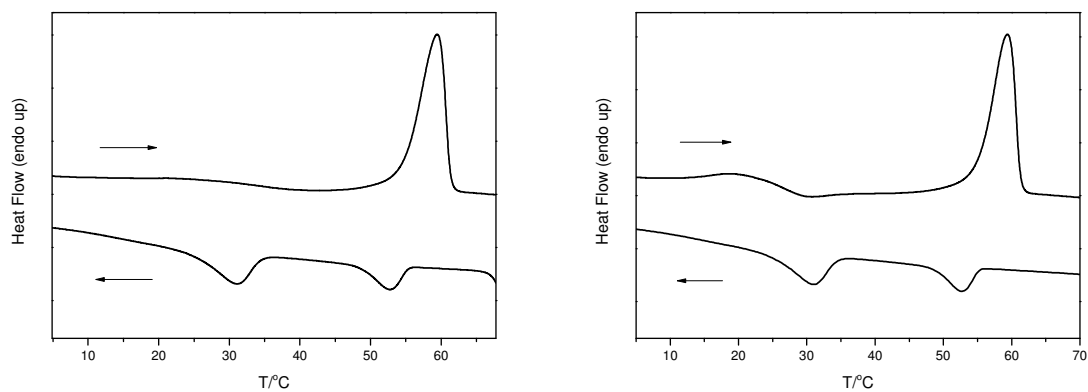

Fig. 6 DSC traces of **2a**, first heating – cooling cycle (left) and second heating-cooling cycle (right).

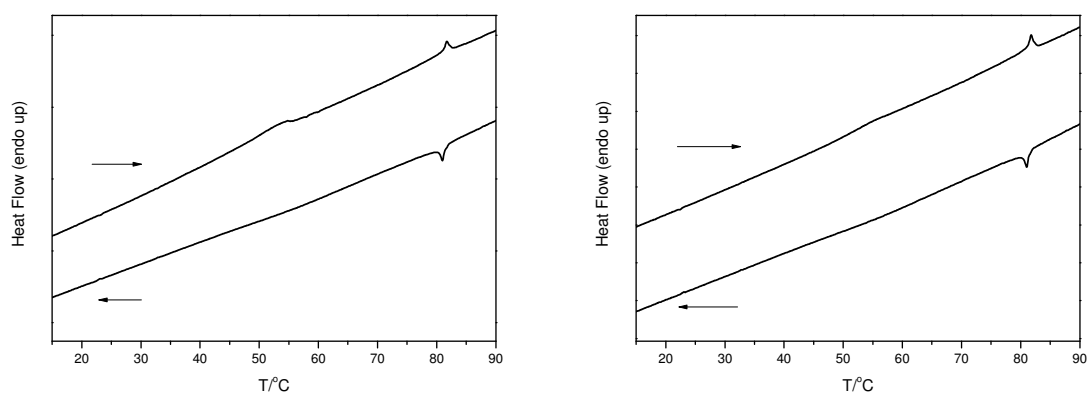

Fig. 7 DSC traces of **2b**, first heating-cooling cycle (left) and second heating-cooling cycle (right).

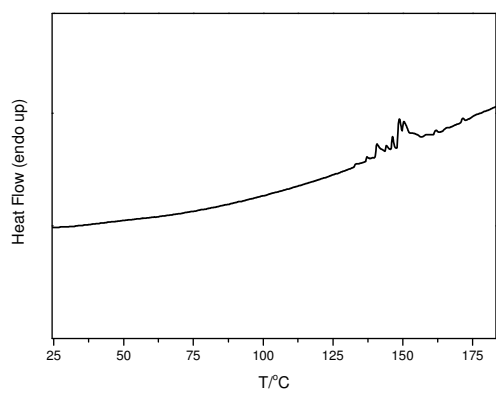

Fig. 8 DSC trace for **2c** (first heating run).



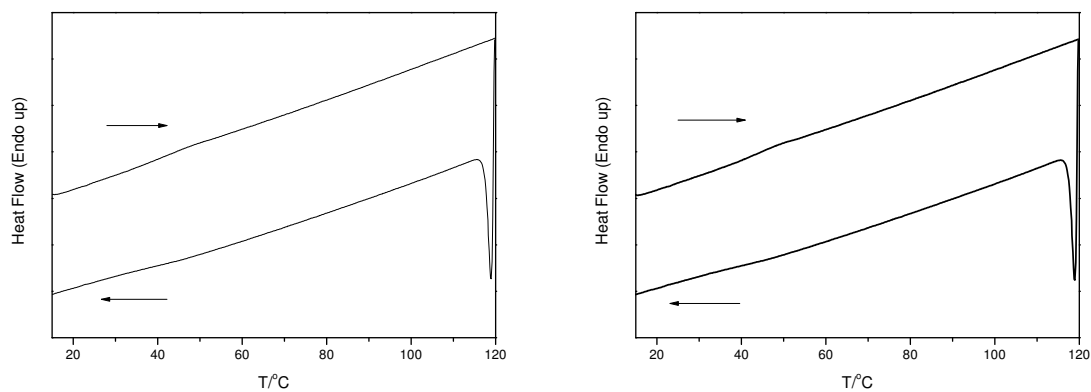

Fig. 9 DSC trace for **2c**, first (left) and second (right) heating cooling cycle up to 120°C.

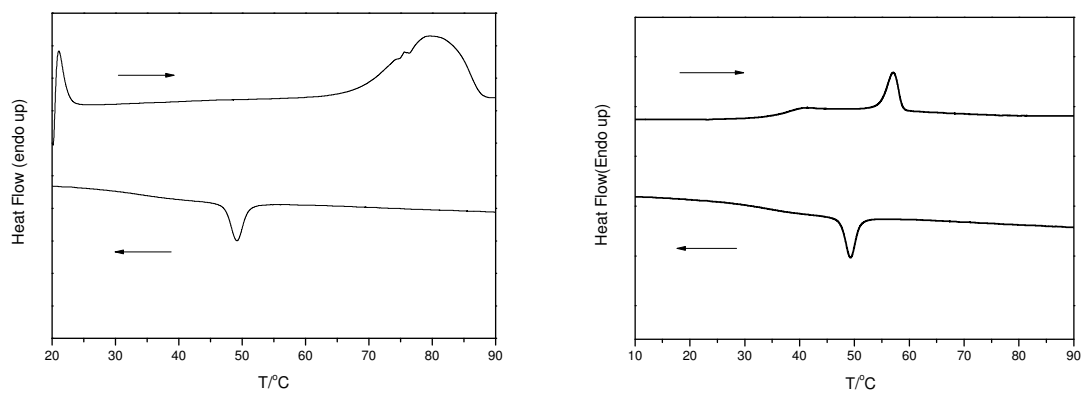

Fig. 10 DSC traces of **3a**, first heating-cooling cycle (left) and second heating-cooling cycle (right)

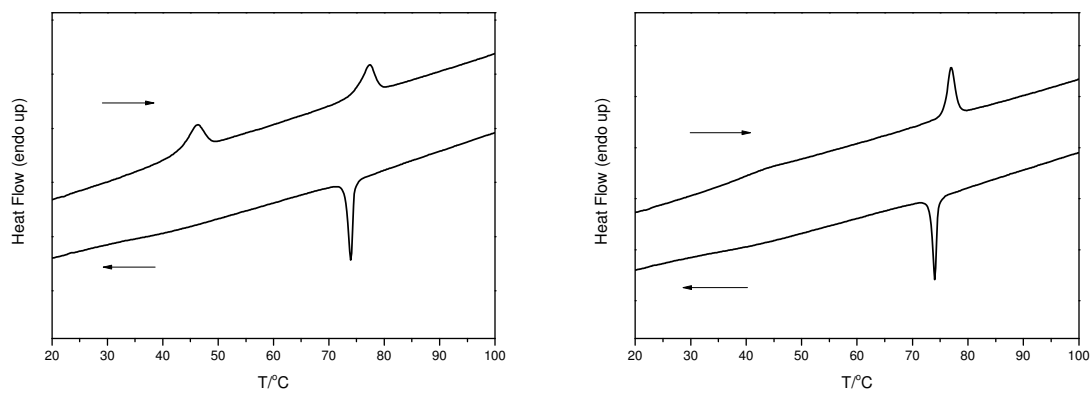

Fig. 11 DSC traces of **3b**, first heating-cooling cycle (left) and second heating-cooling cycle (right).

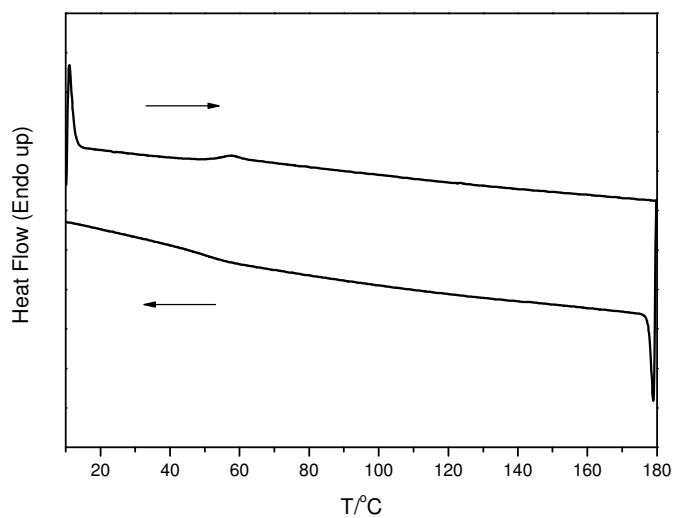

Fig. 12 DSC traces for **3c** (second heating cooling cycle in the 10 – 180°C range)

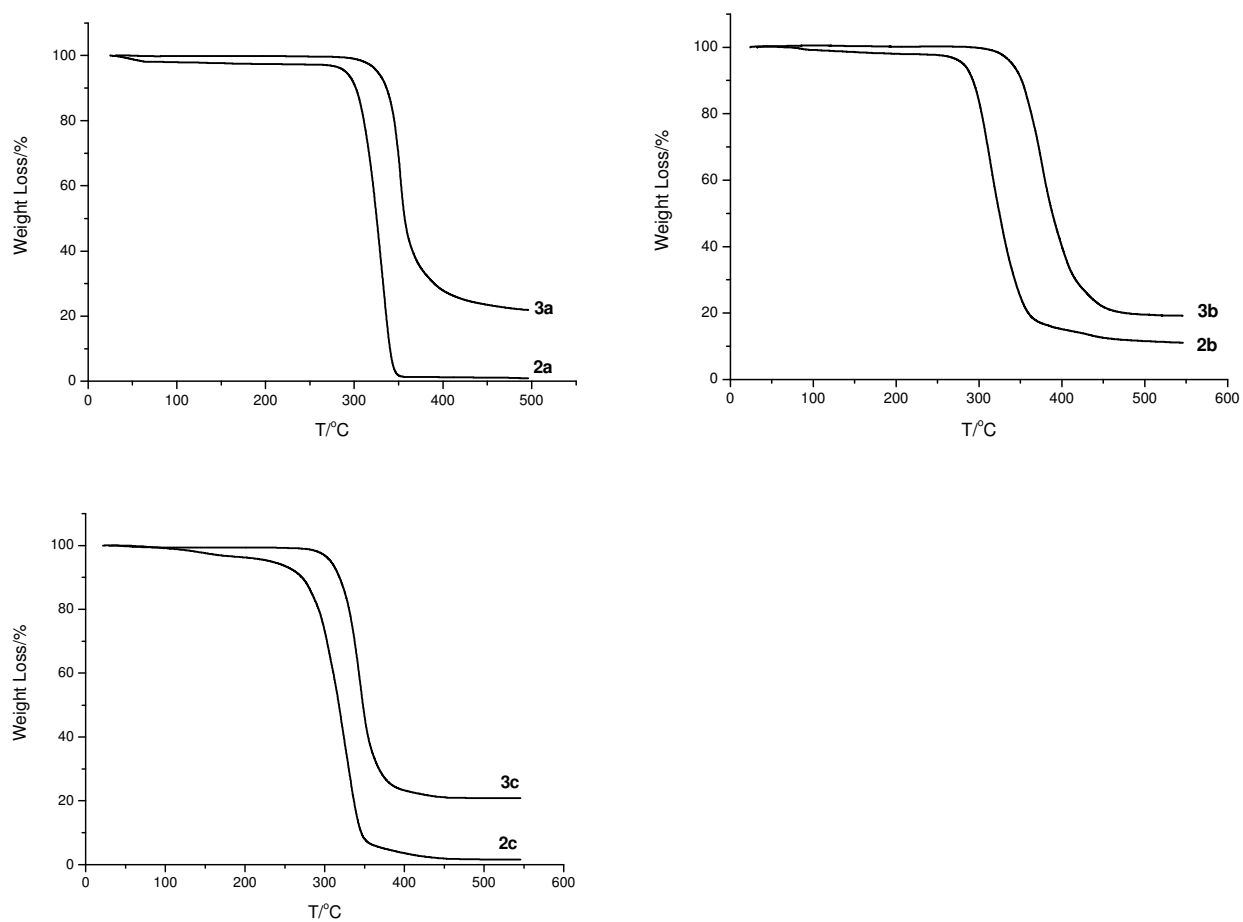

Fig. 13 The TG curves for bis(imidazolium) salts **2a-c** and their silver carbene complexes **3a-c**.

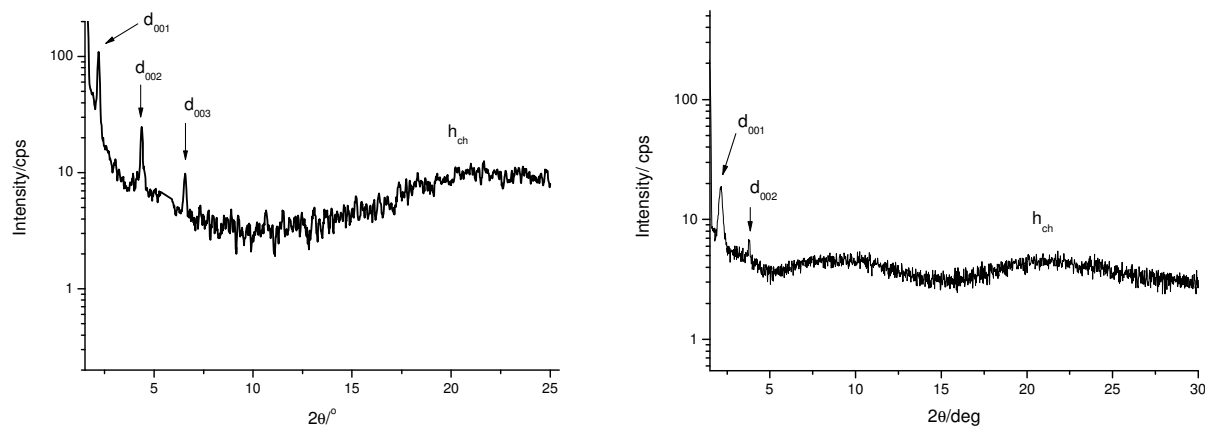

Fig. 14 X-ray powder diffraction pattern for **2a** recorded at 44°C on cooling from isotropic liquid (left) and for **3a** recorded at 50°C on cooling from isotropic liquid (right).

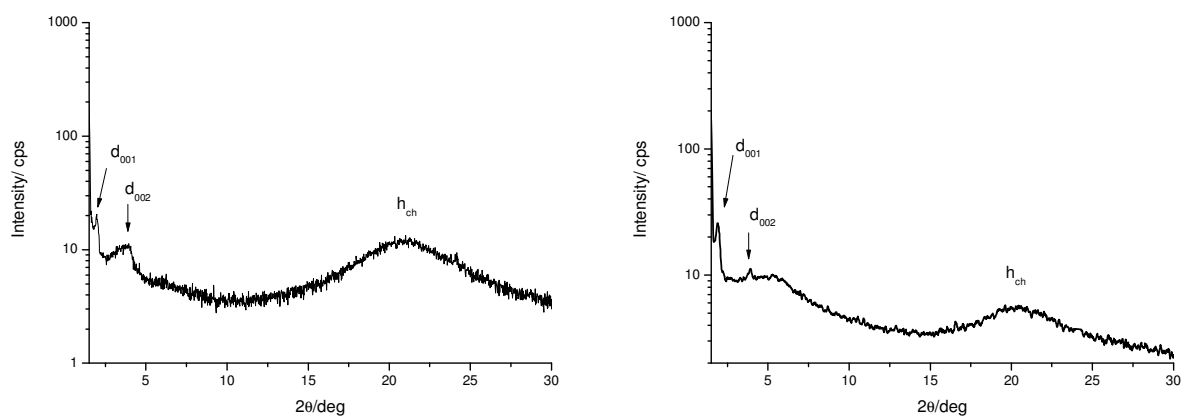

Fig. 15 X-ray powder diffraction pattern for **2b** recorded at 65°C on cooling from isotropic liquid (left) and for **3b** recorded at 60°C on cooling from isotropic liquid (right).



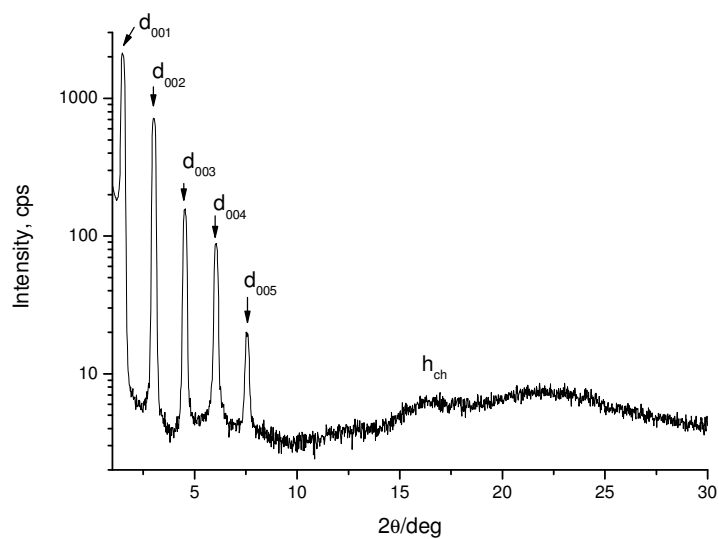

Fig. 16 X-ray powder diffraction pattern for **2c** recorded at 81°C on heating from glassy state.

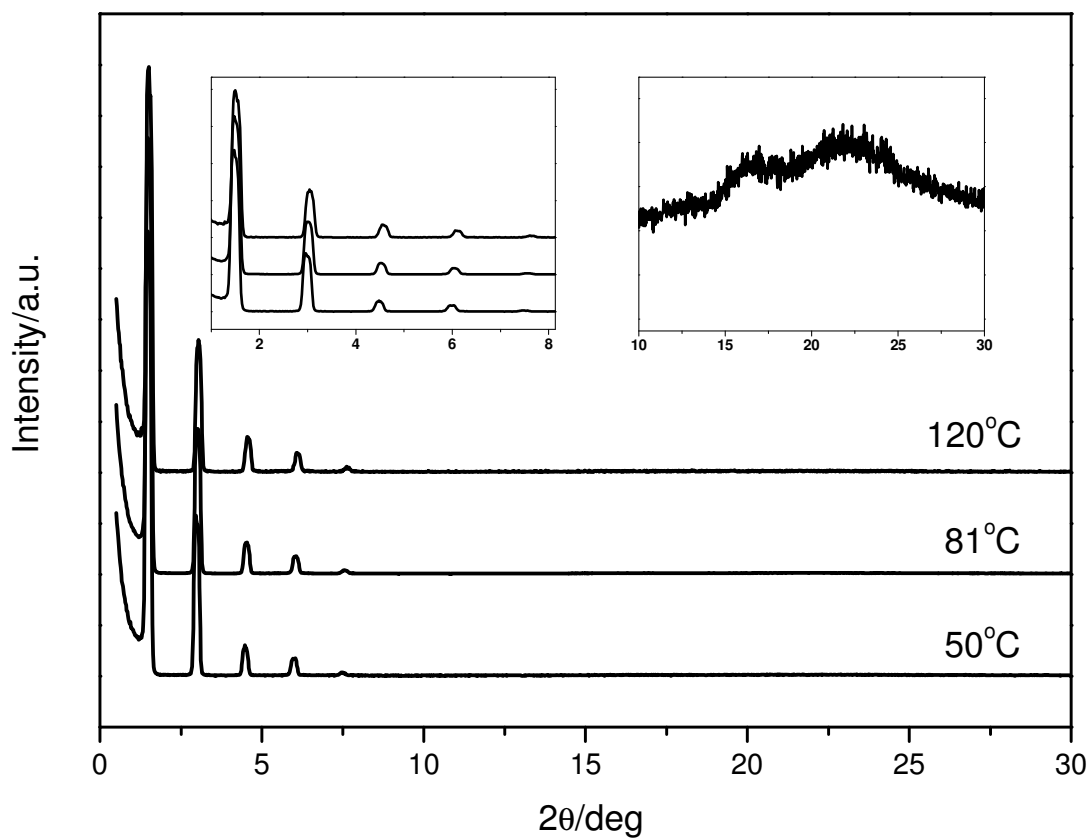

Fig. 17. Powder X-ray diffraction pattern for **2c** at different temperatures.

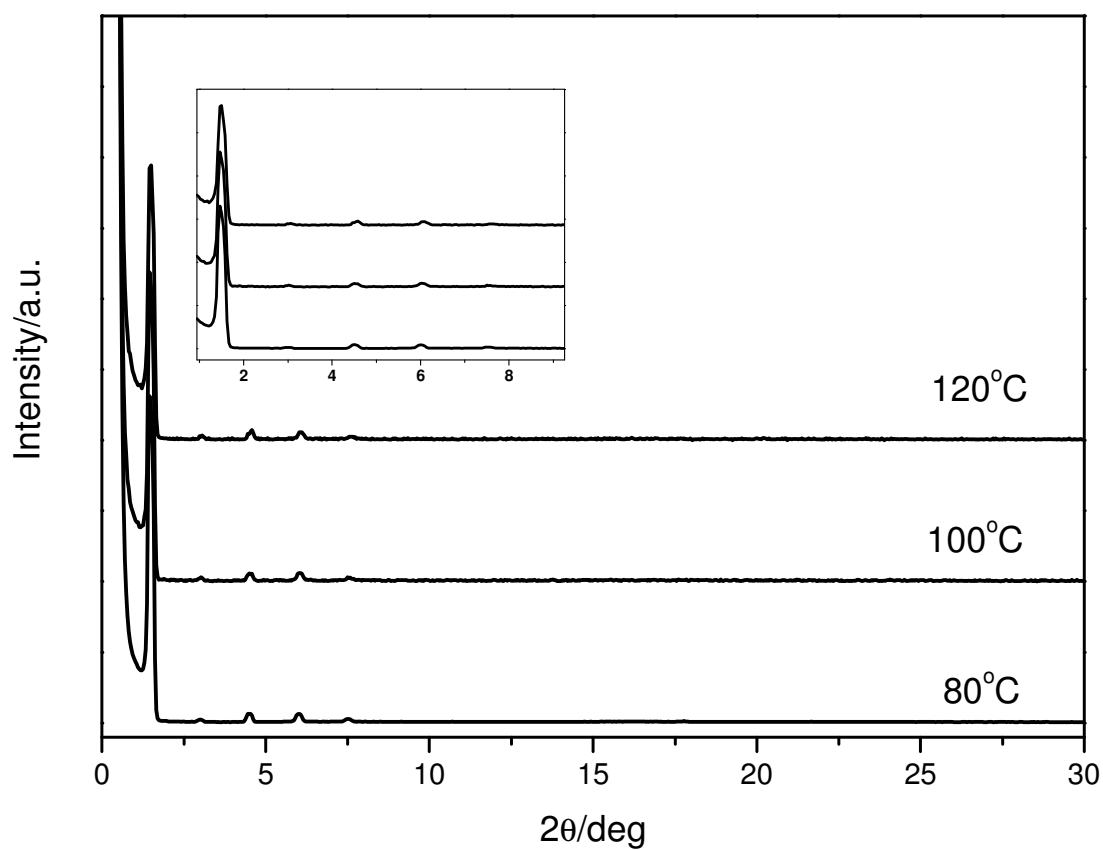

Fig. 18. Powder X-ray diffraction pattern for **3c** at different temperatures.

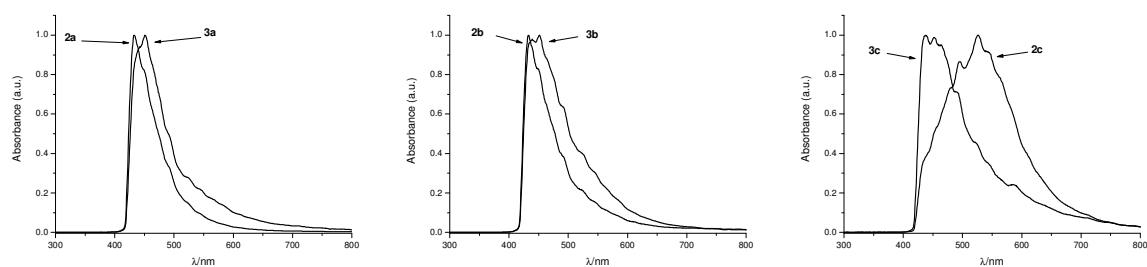

Fig. 19 The solid state emission spectra (recorded as 10% w/w in PMMA films) of bis(imidazolium) salts **2a-c** and their silver carbene complexes **3a-c**.
